# Supplementary material
Source: publisher figshare collection journal article supplement (https://rs.figshare.com/ndownloader/files/13124576)
Supplement: Supplementary file 1 [file 13124576]

Supplemental Figure SF10. Experimental apparatus. Tool manufacturing was studied experimentally by providing 20 ml of previously boiled rainwater in a portable log, placed throughout the chimpanzees’ home range. For each trial, we pre-determined a pool of possible subjects and presented the water-filled apparatus on their predicted pathway prior to visual contact. In addition, tool material was provided in the form of two bunches of moss (*Orthostichella welwitschii* (Duby); yellow arrows) and two branches of leaves (*Acalypha spp;* red arrows) scattered around the log.

**Supplemental Table ST1│ List of subjects, their presumed knowledge and their material choices during the log experiment, at the clay pit and during other sponging events. All subjects had been observed manufacturing leaf-sponges prior to the experiment.**

Group members are presented in alphabetic order. Age classes are assigned following Reynolds’ [64] classification. Moss-sponging observations before the log experiment, required to establish the presumed knowledge, are highlighted in red. “Material choice at clay pit experiment” is extracted from [62].
